# Supplementary material for: Covalent organic framework-modulated interfacial polymerization for ultrathin desalination membranes
Source: Royal Society of Chemistry journal article supplement (doi:10.1039/c9ta08163a), 2019-01-01
Supplement: c9ta08163a1.pdf [file c9ta08163a1.pdf]

## Supporting Information

### **Covalent organic framework modulated interfacial polymerization for ultrathin desalination membranes**

Jinqiu Yuan,<sup>ab</sup> Mengyuan Wu,<sup>ab</sup> Hong Wu,<sup>\*ab</sup> Yanan Liu,<sup>ab</sup> Xinda You,<sup>ab</sup> Runnan

Zhang,<sup>ab</sup> Yanlei Su,<sup>ab</sup> Hao Yang,<sup>ab</sup> Jianliang Shen,<sup>ab</sup> and Zhongyi Jiang,<sup>\*ab</sup>

*<sup>a</sup>Key Laboratory for Green Chemical Technology of Ministry of Education, School of  
Chemical Engineering and Technology, Tianjin University, Tianjin 300072, China*

*<sup>b</sup>Collaborative Innovation Center of Chemical Science and Engineering (Tianjin),  
Tianjin, 300072, China*

*\* E-mail: wuhong@tju.edu.cn; zhyjiang@tju.edu.cn*

## 2. Experimental section

### 2.1 Preparation of covalent organic framework<sup>1</sup>

0.3 mmol of 1,3,5-triformylphloroglucinol (Tp), 0.45 mmol of p-phenylenediamine (Pa-1), 1.5 mL of mesitylene, 1.5 mL of 1,4-dioxane and 0.5 mL of 6 M aqueous acetic acid were added into a Pyrex tube (o.d.  $\times$  i.d. = 5  $\times$  4 mm<sup>2</sup> and length 10 cm). Then the mixture was sonicated for 10 minutes to ensure homogeneous dispersion. The tube was flash frozen at 77 K (liquid N<sub>2</sub> bath) and degassed by three freeze-pump-thaw cycles. After sealing off, the tube was then heated at 120 °C for 72 h. A red colored precipitate was collected by centrifugation and washed it successively by acetone, tetrahydrofuran and dichloromethane. The powder collected was then solvent exchanged with acetone 2-3 times and stirred for 48 h. Finally, the powder was dried at 120 °C under vacuum for 12 h to get a deep red colored powder in ~80% isolated yield.

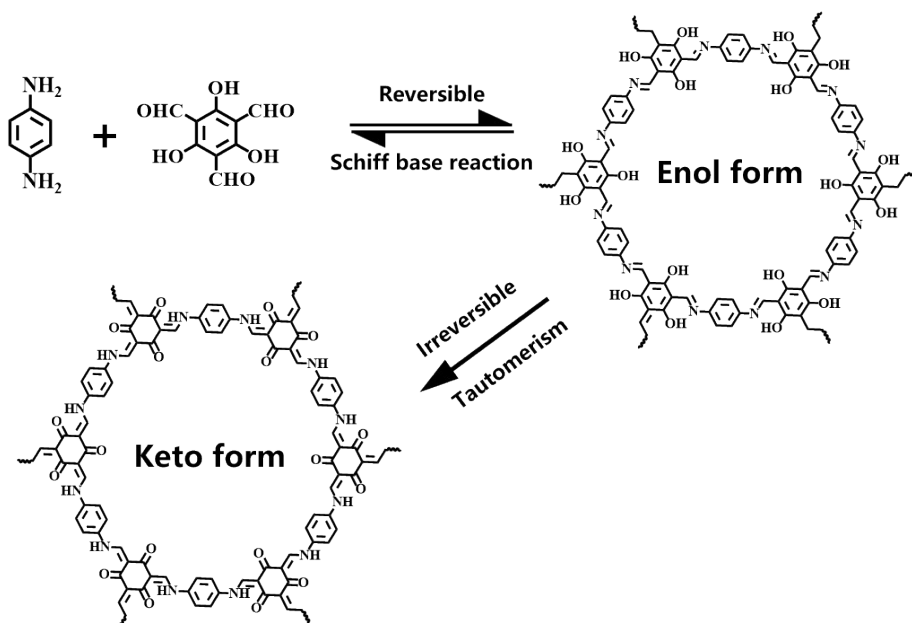

14

Fig. S1. Schematic representation of the synthesis of TpPa-1 by the combined reversible and irreversible reaction of 1,3,5-triformylphloroglucinol with p-phenylenediamine.

### 2.2 Preparation of covalent organic framework nanosheets<sup>2</sup>

80 mg of as-prepared covalent organic framework was placed in a mortar (i.d. = 100 mm) and grounded with 1-2 drops of methanol for 1 h. The fine powders were then dispersed in 100 mL of methanol. The resulting suspension was centrifuged at 8000 rpm for 5 min to obtain a clear solution. After the complete evaporation of methanol,

1 the resultant TpPa-1 covalent organic framework nanosheets (CONs) were obtained.

2

3 Table S1. Mass density of CONs for different CLS substrate.

| Samples | content of CONs loading(mg) | Mass density (g/m <sup>2</sup> ) |
|---------|-----------------------------|----------------------------------|
| CLS(1)  | 0.1                         | 0.058                            |
| CLS(2)  | 0.2                         | 0.116                            |
| CLS(3)  | 0.3                         | 0.173                            |
| CLS(4)  | 0.4                         | 0.231                            |
| CLS(5)  | 0.5                         | 0.289                            |
| CLS(6)  | 0.6                         | 0.347                            |

4 Table S1 listed the mass density of CONs for different CLS substrate. For  
5 convenient narration, the fabricated substrates were designed as CLS(*x*) where *x*  
6 represented the content of CONs loading. For example, CLS(5) was the substrate with  
7 CONs loading of 0.5 mg.

### 8 3. Results and discussion section

#### 9 3.1 Characterization of CONs

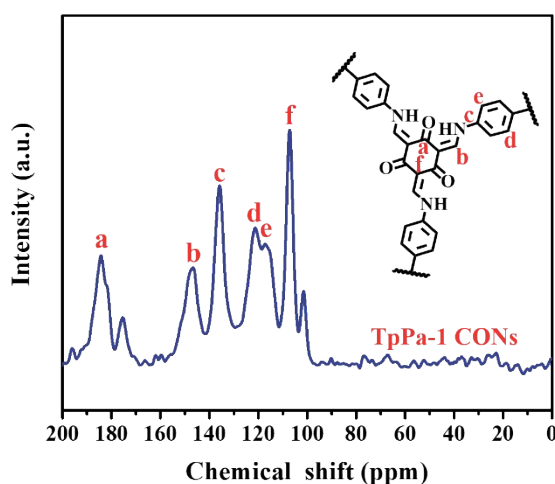

10

11 Fig. S2 The <sup>13</sup>C CP-MAS solid-state NMR spectra of CONs.

12 As shown in Fig. S2, the TpPa-1 CONs showed characteristic peaks at 184 ppm  
13 for carbonyl carbons (-C=O) and 107 ppm for exocyclic carbons (-C=C), in accordance  
14 with previous reports<sup>1,2</sup>. The disappearance of peak at 190 ppm (corresponding to -  
15 CHO) gave clear evidence for the complete consumption of the 1,3,5-

- 1 triformylphloroglucinol starting monomer.
- 2 **3.2 Characterization of PA/CLS membranes**

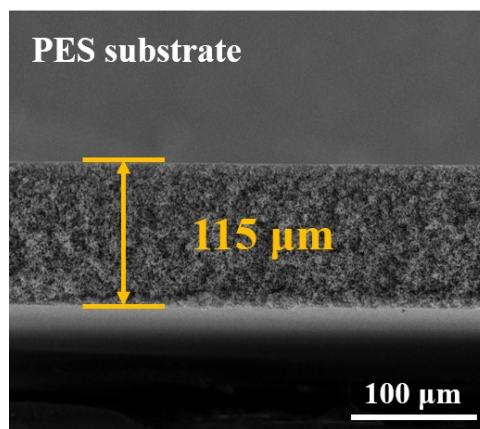

Fig. S3 Cross sectional SEM image of PES substrate.

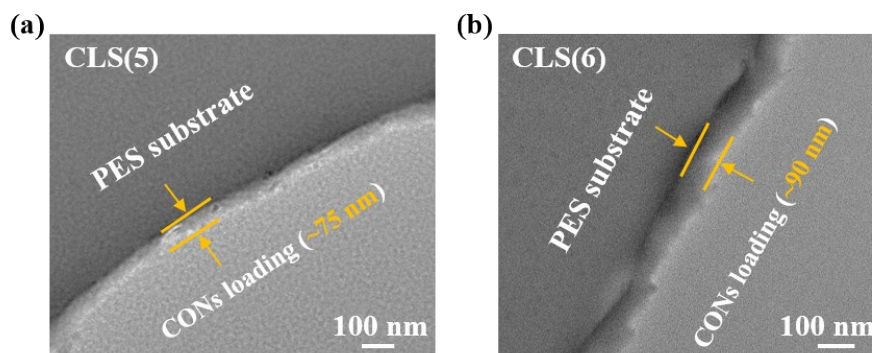

Fig. S4. Cross sectional TEM image of CLS(5) and CLS(6).

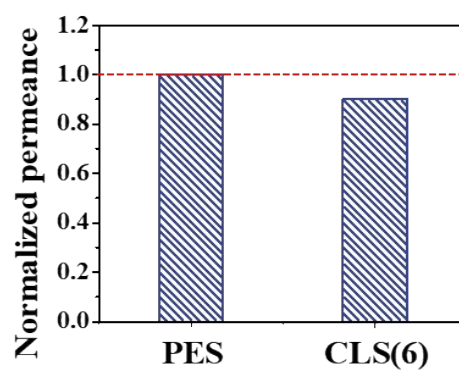

Fig. S5. Normalized permeance of PES and CLS(6) substrate.

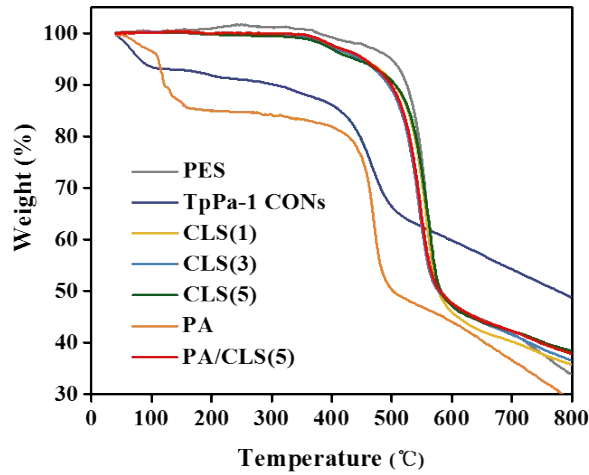

1

2 Fig. S6. (a) TGA curves of PES, TpPa-1 CONs, CLS(1), CLS(3), CLS(5), PA and PA/CLS(5).

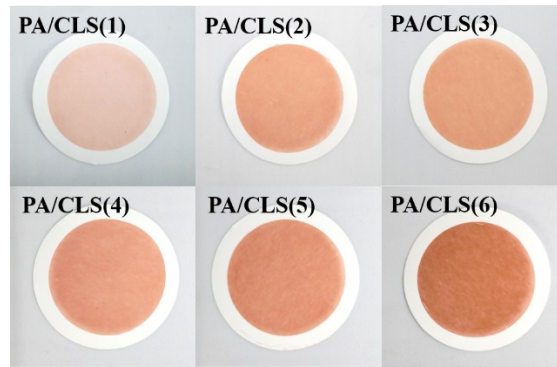

3

4 Fig. S7. The digital photographs of membranes with different loading content of CONs.

5 Table S2. Surface compositions of PA/CLS(X) membranes from XPS data (in atomic percent).

| Membrane  | O (%) | N (%) | O/N  | D (%) <sup>a</sup> |
|-----------|-------|-------|------|--------------------|
| PA/PES    | 17.79 | 9.91  | 1.79 | 10.01              |
| PA/CLS(1) | 15.22 | 10.25 | 1.48 | 41.45              |
| PA/CLS(3) | 14.66 | 10.86 | 1.35 | 55.36              |
| PA/CLS(5) | 17.09 | 13.01 | 1.31 | 59.74              |

6 <sup>a</sup> The crosslinking degree (%) was calculated based on the O/N ratio.

7 Table S2 summarized the elementary composition of as-prepared PA skin layer  
8 modulated by different substrate with varied content of CONs loading.

9 The crosslinking degree(D) was calculated as follows:

10 
$$\frac{O}{N} = \frac{3m + 4n}{3m + 2n}$$

1 
$$D = \frac{m}{m+n} \times 100\%$$

2 where m and n were the cross-linked and linear proportion of the PA selective layer,

3 respectively.

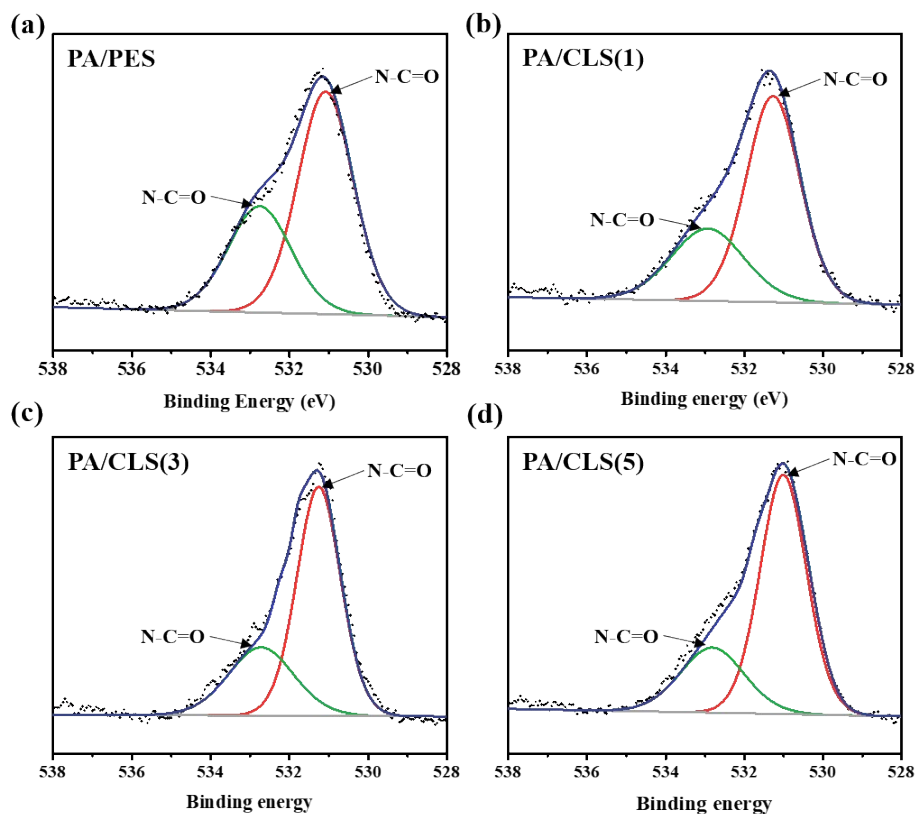

4

5 Fig. S8. High-resolution XPS spectra of PA/PES, PA/CLS(1), PA/CLS(3) and PA/CLS(5)

6 membranes. Convolved high-resolution O1s (a-d).

7 Table S3. Species and composition determined from the deconvolution of O1s core level XPS

8 spectra calculated based on Fig. S3.

| Membrane  | N-C=O | O-C=O |
|-----------|-------|-------|
| PA/PES    | 64.87 | 35.13 |
| PA/CLS(1) | 67.76 | 32.24 |
| PA/CLS(3) | 69.36 | 30.66 |
| PA/CLS(5) | 72.78 | 27.22 |

9

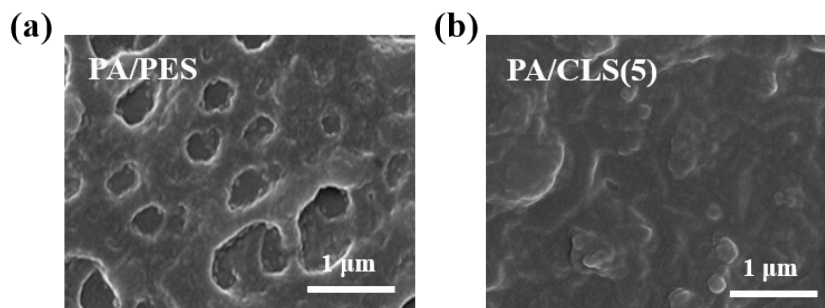

Fig. S9. SEM images of PA/PES and PA/CLS(5) membrane.

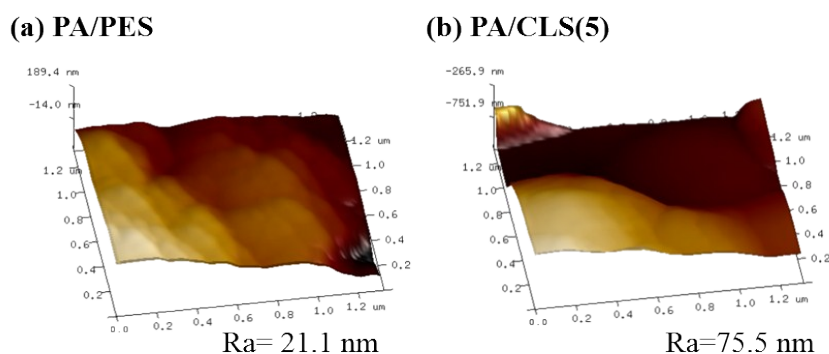

Fig. S10. AFM images and surface roughness (Ra) of PA/PES and PA/CLS(5) membrane.

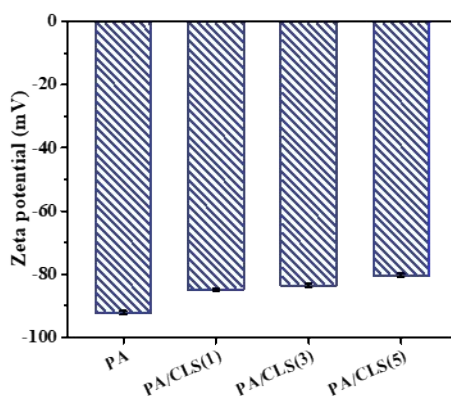

Fig. S11. Chargeability of PA/PES, PA/CLS(1), PA/CLS(3) and PA/CLS(5) membranes.

The zeta potential was measured utilizing 0.001 mol/L KCl solution ( $\text{pH}=6.0\pm0.2$ ) at  $25\pm0.5$  °C and each sample was measured for 4 times to eliminate error. Each above value was based on the average of two independent membranes fabricated under the same condition.

### 1 3.3 Separation performance of PA/CONs membrane

2 Table S4. The summary of separation performance of all the membranes tested in this work.

| Membrane name | Pure water flux<br>(L m <sup>-2</sup> h <sup>-1</sup> ) | Permeance<br>(L m <sup>-2</sup> h <sup>-1</sup> MPa) | Na <sub>2</sub> SO <sub>4</sub> rejection<br>(%) |
|---------------|---------------------------------------------------------|------------------------------------------------------|--------------------------------------------------|
| PA/PES        | 31.3                                                    | 156.6                                                | 85.9                                             |
| PA/CLS(1)     | 41.6                                                    | 207.9                                                | 93.1                                             |
| PA/CLS(2)     | 64.4                                                    | 321.8                                                | 92.7                                             |
| PA/CLS(3)     | 74.1                                                    | 370.2                                                | 93.0                                             |
| PA/CLS(4)     | 82.6                                                    | 413.0                                                | 93.9                                             |
| PA/CLS(5)     | 107.1                                                   | 535.5                                                | 94.3                                             |
| PA/CLS(6)     | 97.5                                                    | 487.4                                                | 93.7                                             |

3 Table S4 summarized the pure water flux and salt rejection of all the membranes  
 4 tested in this work. (Testing condition: 1000 ppm salt feed under 0.2 MPa; 25 °C; 0.9  
 5 cm<sup>2</sup> membrane area; each above value was based on the average of two independent  
 6 membranes fabricated under the same condition)

7 Table S5. Comparison of the separation performance of different membranes in the literatures.

|                                               | Membrane            | Flux<br>(L m <sup>-2</sup> h <sup>-1</sup> MPa <sup>-1</sup> ) | Na <sub>2</sub> SO <sub>4</sub> Rejection<br>(%) | Reference |
|-----------------------------------------------|---------------------|----------------------------------------------------------------|--------------------------------------------------|-----------|
| Membranes<br>prepared by new<br>monomers      | Polycyclenamide NF  | 40.3                                                           | 94.1                                             | [3]       |
|                                               | DCH-TMC NF          | 74.3                                                           | 98.1                                             | [4]       |
|                                               | TFC NF-PO           | 268.3                                                          | 92.1                                             | [5]       |
|                                               | PA@DCA              | 21.6                                                           | 98.0                                             | [6]       |
|                                               | NFM-4               | 71.8                                                           | 97                                               | [7]       |
| Membranes<br>fabricated with<br>nanomaterials | Si/PIP-amide TFC NF | 78.0                                                           | 97.4                                             | [8]       |
|                                               | PEG-POSS-PA         | 163.5                                                          | 87.1                                             | [9]       |
|                                               | PA/TNT              | 74.8                                                           | 96.4                                             | [10]      |
|                                               | GO/TFN              | 156.3                                                          | 96.6                                             | [11]      |
|                                               | TFN(DOX)            | 201.0                                                          | 90.0                                             | [12]      |
| Membranes formed<br>on optimized<br>substrate | PA/PD/SWCNTs        | 320.0                                                          | 95.9                                             | [13]      |
|                                               | PA/CNC/PES          | 340.0                                                          | 97.0                                             | [14]      |



|                      |            |       |      |      |
|----------------------|------------|-------|------|------|
|                      | PA/PDA/PEI | 98.0  | 96.8 | [15] |
|                      | UCN        | 327.0 | 70.8 | [16] |
|                      | TFC NFMs   | 175.7 | 95.0 | [17] |
| Commercial membranes | NF270(DOW) | 148.0 | 98.0 | [18] |

## 1 References

1. S. Kandambeth, A. Mallick, B. Lukose, M. V. Mane, T. Heine and R. Banerjee, *Journal of the American Chemical Society*, 2012, **134**, 19524-19527.
2. S. Chandra, S. Kandambeth, B. P. Biswal, B. Lukose, S. M. Kunjir, M. Chaudhary, R. Babarao, T. Heine and R. Banerjee, *Journal of the American Chemical Society*, 2013, **135**, 17853-17861.
3. G. E. Chen, Y. J. Liu, Z. L. Xu, D. Hu, H. H. Huang and L. Sun, *J Appl Polym Sci*, 2015, **33**, 132.
4. G.-E. Chen, Y.-J. Liu, Z.-L. Xu, Y.-J. Tang, H.-H. Huang and L. Sun, *RSC Adv*, 2015, **5**, 40742-40752.
5. Y.-J. Tang, L.-J. Wang, Z.-L. Xu, Y.-M. Wei and H. Yang, *Journal of Membrane Science*, 2016, **502**, 106-115.
6. D. Ren, X.-T. Bi, T.-Y. Liu and X. Wang, *Journal of Materials Chemistry A*, 2019, **7**, 1849-1860.
7. Q.-F. An, W.-D. Sun, Q. Zhao, Y.-L. Ji and C.-J. Gao, *Journal of Membrane Science*, 2013, **431**, 171-179.
8. D. Hu, Z.-L. Xu and C. Chen, *Desalination*, 2012, **301**, 75-81.
9. X. You, T. Ma, Y. Su, H. Wu, M. Wu, H. Cai, G. Sun and Z. Jiang, *Journal of Membrane Science*, 2017, **540**, 454-463.
10. G. S. Lai, W. J. Lau, S. R. Gray, T. Matsuura, R. J. Gohari, M. N. Subramanian, S. O. Lai, C. S. Ong, A. F. Ismail, D. Emazadah and M. Ghanbari, *Journal of Materials Chemistry A*, 2016, **4**, 4134-4144.
11. W. Zhao, H. Liu, N. Meng, M. Jian, H. Wang and X. Zhang, *Journal of Membrane Science*, 2018, **565**, 380-389.
12. T.-Y. Liu, Z.-H. Liu, R.-X. Zhang, Y. Wang, B. V. d. Bruggen and X.-L. Wang, *Journal of Membrane Science*, 2015, **488**, 92-102.
13. Y. Zhu, W. Xie, S. Gao, F. Zhang, W. Zhang, Z. Liu and J. Jin, *Small*, 2016, **12**, 5034-5041.
14. J.-J. Wang, H.-C. Yang, M.-B. Wu, X. Zhang and Z.-K. Xu, *Journal of Materials Chemistry A*, 2017, **5**, 16289-16295.
15. X. Yang, Y. Du, X. Zhang, A. He and Z.-K. Xu, *Langmuir*, 2017, **33**, 2318-2324.
16. F. Soyekwo, Q. Zhang, R. Gao, Y. Qu, C. Lin, X. Huang, A. Zhu and Q. Liu, *Journal of Membrane Science*, 2017, **524**, 174-185.
17. M.-B. Wu, Y. Lv, H.-C. Yang, L.-F. Liu, X. Zhang and Z.-K. Xu, *Journal of Membrane Science*, 2016, **515**, 238-244.
18. Z. Wang, Z. Wang, S. Lin, H. Jin, S. Gao, Y. Zhu and J. Jin, *Nature Communications*, 2018, **9**, 2004.
